# Supplementary material for: Highly Species-Specific Foliar Metabolomes of Diverse Woody Species and Relationships with the Leaf Economics Spectrum
Source: PubMed Central journal article supplement (PMC7999030; doi:10.3390/cells10030644), 2021-03-13
Supplement: cells-10-00644-s001.pdf [file cells-10-00644-s001.pdf]

## Supplement

# Highly Species-Specific Foliar Metabolomes of Diverse Woody Species and Relationships with the Leaf Economics Spectrum

Rabea Schweiger, Eva Castells, Luca da Sois, Jordi Martínez-Vilalta and Caroline Müller

**Supplementary Table S1:** Retention indices (RI) and mass to charge ratios (m/z) of the identified metabolites. RI were calculated from the GC-FID measurements while the m/z values, shown as *m/z (intensity)*, were derived from the GC-MS measurements. All the metabolites were also identified via comparison with reference standards.

| Metabolite           | RI        | Mass to charge ratio (m/z)                                                                                           |
|----------------------|-----------|----------------------------------------------------------------------------------------------------------------------|
| <b>Sugars</b>        |           |                                                                                                                      |
| fructose             | 1828/1838 | 73 (100), 307 (81.6), 217 (80.7), 103 (78.9), 147 (39.6), 308 (22.5), 277 (15.6), 133 (14.1), 205 (10.2), 364 (10.2) |
| glucose              | 1853/1873 | 319 (100), 73 (74.9), 205 (57.8), 147 (40.0), 160 (31.0), 320 (29.5), 321 (14.5), 206 (14.4), 103 (11.7), 204 (8.5)  |
| galactose            | 1846/1869 | 319 (100), 205 (74.6), 147 (37.8), 320 (31.7), 160 (22.4), 206 (18.3), 321 (14.7), 204 (9.9), 75 (9.5), 229 (8.7)    |
| sucrose              | 2607      |                                                                                                                      |
| <b>Organic acids</b> |           |                                                                                                                      |
| oxalic acid          | 1134      | 147 (100), 73 (67.5), 148 (15.3), 190 (8.2), 149 (7.5), 74 (6.0), 66 (5.1), 72 (4.8), 219 (4.8), 133 (4.0)           |
| citric acid          | 1779      | 273 (100), 73 (67.8), 147 (59.3), 363 (26.9), 347 (24.8), 375 (23.5), 465 (15.0), 75 (11.1), 275 (9.8), 149 (9.5)    |
| <b>Polyalcohols</b>  |           |                                                                                                                      |
| <i>myo</i> -inositol | 2051      | 305 (100), 217 (82.4), 73 (64.9), 318 (57.4), 147 (51.0), 191 (39.3), 319 (24.3), 265 (19.8), (16.9), 432 (12.8)     |

## Supplementary Figure S1: NMDS-contour line plots for C per leaf area and N per area.

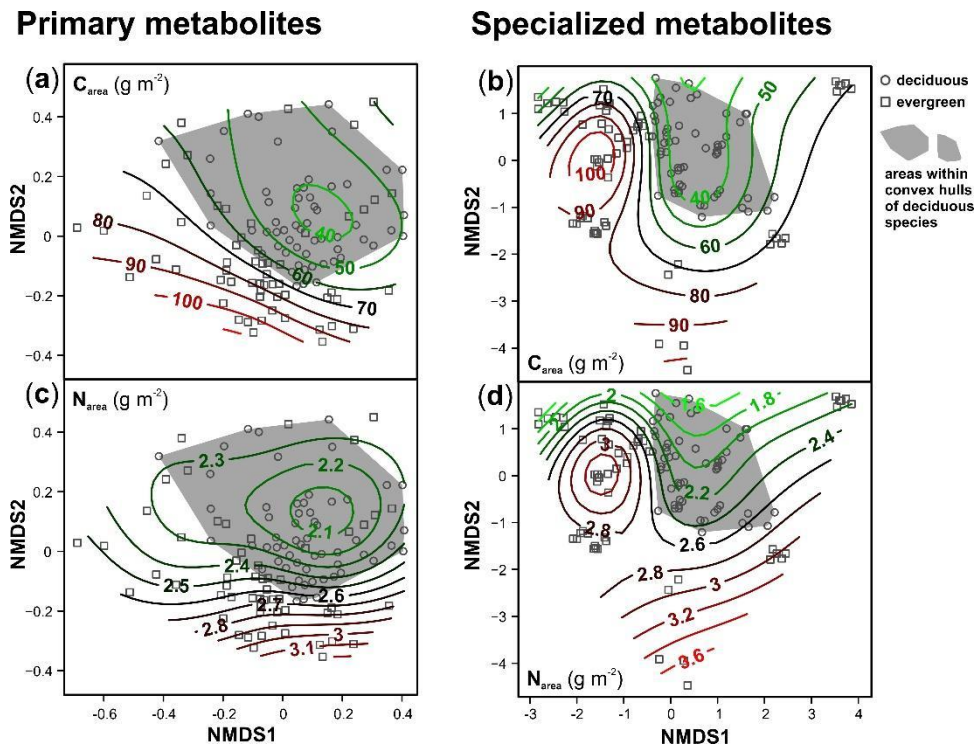

**Figure S1.** Simplified non-metric multidimensional scaling plots of relative concentrations of metabolic features of the primary (left) and specialized (right) metabolism detected in leaves of 20 plant species (deciduous: circles; evergreen: squares). The deciduous species are highlighted by gray areas that are framed by convex hulls (closed curves surrounding all data points with minimum perimeter) for this group. Contour lines (green: low values; red: high) representing surface fits of generalized additive models for: (a, b) carbon (C) per leaf area ( $C_{\text{area}}$ ); (c, d) nitrogen (N) per area ( $N_{\text{area}}$ ).
